# Supplementary material for: A green, fast protocol to estimate the accumulation of airborne anthropogenic microfibers in Pittosporum tobira in urban areas: effects of season and rainfall
Source: PeerJ. 2026 Jan 14;14:e20558. doi: 10.7717/peerj.20558 (PMC12811961; doi:10.7717/peerj.20558)
Supplement: Supplemental Information 1 [file peerj-14-20558-s001.xlsx]

## Sheet: RAW DATA NUMBER 
			SITE	SEASON	NUMBER			Treatment	Side	Nr.	Treatment	Side	Nr.
Legend			Ind	S	160			Pre-W	F	18	U_10	F	11
	SITE		Ind	S	143			Pre-W	F	23	U_10	F	10
	Industrial	Ind	Ind	S	140			Pre-W	F	19	U_10	F	10
	Urban_1	U1	U1	S	92			Pre-W	F	19	U_10	F	12
	Green_1	G1	U1	S	89			Pre-W	F	22	U_10	F	10
	Green_2	G2	U1	S	87			Pre-W	F	20	U_10	F	11
	Urban_2	U2	G1	S	84			Pre-W	F	23	U_10	F	11
	Green_3	G3	G1	S	84			Pre-W	F	22	U_10	F	10
	SASON		G1	S	79			Pre-W	F	18	U_10	F	14
	Summer	S	G2	S	48			Pre-W	R	15	U_10	R	15
	Autumn	W	G2	S	43			Pre-W	R	13	U_10	R	11
	Treatments		G2	S	49			Pre-W	R	15	U_10	R	11
	Washing	Pre-W	U2	S	125			Pre-W	R	12	U_10	R	15
		Post-W	U2	S	132			Pre-W	R	13	U_10	R	11
	Sheltered	S	U2	S	116			Pre-W	R	14	U_10	R	9
	Unsheltered	U	G3	S	54			Pre-W	R	12	U_10	R	10
	10	days	G3	S	60			Pre-W	R	12	U_10	R	10
	15	days	G3	S	77			Pre-W	R	15	U_10	R	11
			Ind	w	71			Pre-W	T	33	U_10	T	26
			Ind	w	81			Pre-W	T	36	U_10	T	21
			Ind	w	88			Pre-W	T	34	U_10	T	21
			U1	w	47			Pre-W	T	31	U_10	T	27
			U1	w	55			Pre-W	T	35	U_10	T	21
			U1	w	57			Pre-W	T	34	U_10	T	20
			G1	w	66			Pre-W	T	35	U_10	T	21
			G1	w	72			Pre-W	T	34	U_10	T	20
			G1	w	71			Pre-W	T	33	U_10	T	25
			G2	w	53			Post-W	F	8	S_10	F	49
			G2	w	42			Post-W	F	10	S_10	F	35
			G2	w	60			Post-W	F	9	S_10	F	38
			U2	w	60			Post-W	F	8	S_10	F	48
			U2	w	64			Post-W	F	9	S_10	F	36
			U2	w	58			Post-W	F	10	S_10	F	39
			G3	w	24			Post-W	F	9	S_10	F	38
			G3	w	32			Post-W	F	8	S_10	F	41
			G3	w	23			Post-W	F	11	S_10	F	35
								Post-W	R	6	S_10	R	26
								Post-W	R	5	S_10	R	24
								Post-W	R	7	S_10	R	24
								Post-W	R	5	S_10	R	22
								Post-W	R	6	S_10	R	23
								Post-W	R	7	S_10	R	24
								Post-W	R	4	S_10	R	26
								Post-W	R	5	S_10	R	24
								Post-W	R	5	S_10	R	27
								Post-W	T	14	S_10	T	75
								Post-W	T	15	S_10	T	59
								Post-W	T	16	S_10	T	62
								Post-W	T	13	S_10	T	70
								Post-W	T	15	S_10	T	59
								Post-W	T	17	S_10	T	63
								Post-W	T	13	S_10	T	64
								Post-W	T	13	S_10	T	65
								Post-W	T	16	S_10	T	60
											U_15	F	12
											U_15	F	10
											U_15	F	13
											U_15	F	12
											U_15	F	10
											U_15	F	14
											U_15	F	13
											U_15	F	16
											U_15	F	15
											U_15	R	12
											U_15	R	16
											U_15	R	14
											U_15	R	11
											U_15	R	16
											U_15	R	14
											U_15	R	12
											U_15	R	10
											U_15	R	9
											U_15	T	24
											U_15	T	26
											U_15	T	27
											U_15	T	23
											U_15	T	26
											U_15	T	28
											U_15	T	25
											U_15	T	26
											U_15	T	21
											S_15	F	36
											S_15	F	34
											S_15	F	36
											S_15	F	38
											S_15	F	43
											S_15	F	35
											S_15	F	37
											S_15	F	33
											S_15	F	36
											S_15	R	27
											S_15	R	19
											S_15	R	23
											S_15	R	26
											S_15	R	29
											S_15	R	24
											S_15	R	26
											S_15	R	28
											S_15	R	22
											S_15	T	63
											S_15	T	53
											S_15	T	59
											S_15	T	64
											S_15	T	72
											S_15	T	59
											S_15	T	63
											S_15	T	61
											S_15	T	58

## Sheet: Raw data Length
Legend				CODE	length
	SITE			I_S	0.444444
	Industrial	Ind		I_S	0.277778
	Urban_1	U1		I_S	0.555556
	Green_1	G1		I_S	0.28
	Green_2	G2		I_S	0.6
	Urban_2	U2		I_S	0.16
	Green_3	G3		I_S	0.12
	SASON			I_S	0.16
	Summer	S		I_S	0.16
	Autumn	W		I_S	0.2
				I_S	0.16
				I_S	0.16
				I_S	0.6
				I_S	0.48
				I_S	0.24
				I_S	0.2
				I_S	0.24
				I_S	0.12
				I_S	0.52
				I_S	0.16
				I_S	0.44
				I_S	0.24
				I_S	0.6
				I_S	0.2
				I_S	11.2222
				I_S	0.24
				I_S	1.2
				I_S	0.12
				I_S	0.32
				I_S	0.12
				I_S	0.16
				I_S	0.28
				I_S	1.84
				I_S	0.16
				I_S	0.16
				I_S	0.16
				I_S	0.16
				I_S	0.12
				I_S	0.24
				I_S	0.16
				I_S	0.12
				I_S	0.12
				I_S	0.16
				I_S	0.2
				I_S	0.24
				I_S	0.16
				I_S	0.52
				I_S	0.24
				I_S	0.12
				I_S	4.8
				I_S	2.2
				I_S	0.4
				I_S	0.28
				I_S	0.16
				I_S	0.24
				I_S	0.16
				I_S	0.2
				I_S	1.64
				I_S	0.2
				I_S	0.16
				I_S	0.24
				I_S	0.2
				I_S	0.16
				I_S	0.68
				I_S	0.16
				I_S	0.24
				I_S	0.12
				I_S	0.12
				I_S	0.12
				I_S	0.2
				I_S	0.12
				I_S	0.16
				I_S	0.2
				I_S	1.32
				I_S	0.28
				I_S	0.28
				I_S	0.24
				I_S	0.68
				I_S	0.12
				I_S	1.08
				I_S	0.32
				I_S	0.2
				I_S	0.24
				I_S	0.32
				I_S	0.36
				I_S	0.92
				I_S	0.28
				I_S	0.16
				I_S	0.16
				I_S	0.24
				I_S	0.44
				I_S	0.32
				I_S	7.08333
				I_S	0.2
				I_S	0.2
				I_S	0.24
				I_S	2
				I_S	0.32
				I_S	0.2
				I_S	0.28
				I_S	1.2
				I_S	1.48
				I_S	2.6
				I_S	1.2
				I_S	0.16
				I_S	0.24
				I_S	0.28
				I_S	0.2
				I_S	0.24
				I_S	0.24
				I_S	0.88
				I_S	0.2
				I_S	0.2
				I_S	0.24
				I_S	0.2
				I_S	0.28
				I_S	0.12
				I_S	0.12
				I_S	0.12
				I_S	0.12
				I_S	0.2
				I_S	0.2
				I_S	0.16
				I_S	0.4
				I_S	0.16
				I_S	0.2
				I_S	0.16
				I_S	0.8
				I_S	0.2
				I_S	2.4
				I_S	0.2
				I_S	0.28
				I_S	0.32
				I_S	0.2
				I_S	2
				I_S	0.2
				I_S	0.32
				I_S	4.8
				I_S	0.28
				I_S	0.28
				I_S	0.44
				I_S	1.04
				I_S	0.2
				I_S	5.55556
				I_S	3.6
				I_S	0.6
				I_S	0.32
				I_S	0.16
				I_S	1.4
				I_S	0.28
				I_S	0.8
				I_S	1.2
				I_S	0.32
				I_S	0.24
				I_S	3.2
				I_S	0.2
				I_S	0.16
				I_S	1.6
				I_S	0.16
				I_S	0.2
				U1_S	0.32
				U1_S	0.6
				U1_S	0.2
				U1_S	0.24
				U1_S	0.36
Legend				U1_S	0.48
	SITE			U1_S	0.12
	Industrial	Ind		U1_S	0.96
	Urban_1	U1		U1_S	0.76
	Green_1	G1		U1_S	1.28
	Green_2	G2		U1_S	1.16
	Urban_2	U2		U1_S	0.88
	Green_3	G3		U1_S	1.16
	SASON			U1_S	1.76
	Summer	S		U1_S	1.44
	Autumn	W		U1_S	1.08
				U1_S	0.64
				U1_S	0.44
				U1_S	0.28
				U1_S	0.32
				U1_S	2.64
				U1_S	0.16
				U1_S	0.2
				U1_S	0.36
				U1_S	0.2
				U1_S	0.24
				U1_S	0.4
				U1_S	0.64
				U1_S	1.84
				U1_S	0.48
				U1_S	0.92
				U1_S	0.32
				U1_S	1.64
				U1_S	0.52
				U1_S	0.56
				U1_S	1.76
				U1_S	0.28
				U1_S	0.16
				U1_S	0.44
				U1_S	0.32
				U1_S	0.68
				U1_S	0.84
				U1_S	1.04
				U1_S	0.32
				U1_S	0.48
				U1_S	0.52
				U1_S	1
				U1_S	0.68
				U1_S	0.84
				U1_S	0.28
				U1_S	1.12
				U1_S	2.92
				U1_S	1.12
				U1_S	1.92
				U1_S	0.44
				U1_S	0.68
				U1_S	0.88
				U1_S	1.08
				U1_S	0.16
				U1_S	0.24
				U1_S	0.44
				U1_S	1.08
				U1_S	0.24
				U1_S	0.52
				U1_S	0.68
				U1_S	0.44
				U1_S	0.24
				U1_S	0.96
				U1_S	0.52
				U1_S	0.68
				U1_S	0.36
				U1_S	0.12
				U1_S	0.16
				U1_S	0.28
				U1_S	0.92
				U1_S	0.48
				U1_S	1.96
				U1_S	0.6
				U1_S	0.36
				U1_S	0.12
				U1_S	0.48
				U1_S	0.92
				U1_S	1.88
				U1_S	0.68
				U1_S	0.72
				U1_S	2.24
				U1_S	1.8
				U1_S	1.36
				U1_S	0.84
				U1_S	0.44
				U1_S	0.92
				U1_S	1.36
				U2_S	1
				U2_S	0.4
				U2_S	2.8
				U2_S	0.2
				U2_S	0.2
				U2_S	1
				U2_S	0.4
				U2_S	0.4
				U2_S	0.2
				U2_S	1.8
				U2_S	0.6
				U2_S	0.3
				U2_S	0.9
				U2_S	3.2
				U2_S	0.6
				U2_S	0.4
				U2_S	1.2
				U2_S	0.4
				U2_S	1.1
				U2_S	0.6
				U2_S	0.7
				U2_S	1.7
				U2_S	2.6
				U2_S	3.6
				U2_S	0.3
				U2_S	0.4
				U2_S	2.8
				U2_S	0.8
				U2_S	0.3
				U2_S	0.2
				U2_S	0.3
				U2_S	0.2
				U2_S	0.4
				U2_S	0.4
				U2_S	1.2
				U2_S	0.3
				U2_S	0.2
				U2_S	1
				U2_S	0.4
				U2_S	0.44
				U2_S	0.5
				U2_S	0.3
				U2_S	3.6
				U2_S	6.8
				U2_S	0.8
				U2_S	0.2
				U2_S	1.8
				U2_S	0.3
				U2_S	2.4
				U2_S	0.7
				U2_S	0.4
				U2_S	0.5
				U2_S	0.3
				U2_S	0.4
				U2_S	0.7
				U2_S	0.9
				U2_S	1
				U2_S	0.5
				U2_S	0.2
				U2_S	2.8
				U2_S	1.7
				U2_S	0.4
				U2_S	2.4
				U2_S	0.5
				U2_S	2.1
				U2_S	0.7
				U2_S	0.4
				U2_S	0.3
				U2_S	0.2
				U2_S	0.1
				U2_S	0.3
				U2_S	0.2
				U2_S	0.2
				U2_S	0.4
				U2_S	0.8
				U2_S	0.1
				U2_S	0.5
				U2_S	0.3
				U2_S	0.2
				U2_S	0.3
				U2_S	2.3
				U2_S	5.6
				U2_S	0.2
				U2_S	0.3
				U2_S	0.2
				U2_S	0.6
				U2_S	1.4
				U2_S	1.7
				U2_S	0.3
				U2_S	2.5
				U2_S	1.6
				U2_S	0.4
				U2_S	0.2
				U2_S	1.5
				U2_S	1.1
				U2_S	0.5
				U2_S	0.2
				U2_S	0.2
				U2_S	0.8
				U2_S	1.8
				U2_S	0.4
				U2_S	0.6
				U2_S	0.4
				U2_S	2.3
				U2_S	0.3
				U2_S	1
				U2_S	0.3
				U2_S	1.6
				U2_S	3.9
				U2_S	1.5
				U2_S	0.4
				U2_S	1.2
				U2_S	0.3
				U2_S	0.2
				U2_S	1
				U2_S	0.9
				U2_S	3.1
				U2_S	2.6
				U2_S	1.8
				U2_S	0.5
				U2_S	0.4
				U2_S	1.76
				U2_S	0.48
				U2_S	0.44
				U2_S	0.68
				G1_S	6
				G1_S	2.28
				G1_S	0.2
				G1_S	0.16
				G1_S	0.28
				G1_S	1.08
				G1_S	0.2
				G1_S	0.24
				G1_S	0.4
				G1_S	0.48
				G1_S	1.48
				G1_S	0.44
				G1_S	2.24
				G1_S	0.28
				G1_S	0.28
				G1_S	3.2
				G1_S	5.4
				G1_S	0.2
				G1_S	0.48
				G1_S	1
				G1_S	0.64
				G1_S	0.56
				G1_S	0.32
				G1_S	0.2
				G1_S	0.52
				G1_S	0.24
				G1_S	1.2
				G1_S	1.28
				G1_S	0.2
				G1_S	0.56
				G1_S	1.44
				G1_S	0.52
				G1_S	0.28
				G1_S	0.16
				G1_S	0.48
				G1_S	0.16
				G1_S	0.32
				G1_S	1.12
				G1_S	0.4
				G1_S	0.56
				G1_S	2
				G1_S	1.48
				G1_S	2.32
				G1_S	2.28
				G1_S	0.2
				G1_S	0.16
				G1_S	0.44
				G1_S	0.24
				G1_S	0.92
				G1_S	0.28
				G1_S	1.4
				G1_S	0.24
				G1_S	0.8
				G1_S	0.32
				G1_S	0.28
				G1_S	0.28
				G1_S	0.8
				G1_S	0.28
				G1_S	1.4
				G1_S	0.4
				G1_S	0.24
				G1_S	1.48
				G1_S	1.68
				G1_S	0.28
				G1_S	2.24
				G1_S	0.32
				G1_S	0.4
				G1_S	0.64
				G1_S	3.8
				G1_S	0.16
				G1_S	2.6
				G1_S	0.4
				G1_S	0.6
				G1_S	0.84
				G1_S	0.72
				G1_S	0.48
				G1_S	1.6
				G1_S	1.48
				G1_S	0.4
				G1_S	1.04
				G1_S	1.88
				G1_S	0.32
				G1_S	0.24
				G1_S	0.52
				G2_S	0.48
				G2_S	0.52
				G2_S	0.12
				G2_S	0.16
				G2_S	0.2
				G2_S	0.24
				G2_S	1.08
				G2_S	0.8
				G2_S	0.12
				G2_S	0.96
				G2_S	0.48
				G2_S	0.28
				G2_S	1.72
				G2_S	0.16
				G2_S	1.4
				G2_S	0.52
				G2_S	1.48
				G2_S	0.72
				G2_S	0.28
				G2_S	5.2
				G2_S	0.16
				G2_S	0.68
				G2_S	0.28
				G2_S	1
				G2_S	0.48
				G2_S	4
				G2_S	0.68
				G2_S	0.92
				G2_S	0.48
				G2_S	0.64
				G2_S	1.2
				G2_S	0.8
				G2_S	2
				G2_S	0.64
				G2_S	0.24
				G2_S	0.6
				G2_S	0.44
				G2_S	1.08
				G2_S	1.24
				G2_S	1.8
				G2_S	1.68
				G2_S	2.28
				G2_S	0.52
				G2_S	1.08
				G2_S	0.36
				G2_S	1.24
				G2_S	1.04
				G2_S	0.52
				G3_S	0.68
				G3_S	0.4
				G3_S	0.16
				G3_S	0.24
				G3_S	0.72
				G3_S	1.28
				G3_S	0.16
				G3_S	1.2
				G3_S	1.8
				G3_S	0.28
				G3_S	0.32
				G3_S	0.24
				G3_S	0.8
				G3_S	0.2
				G3_S	0.16
				G3_S	0.64
				G3_S	2.28
				G3_S	0.2
				G3_S	0.84
				G3_S	0.4
				G3_S	1.64
				G3_S	0.825
				G3_S	0.96
				G3_S	0.12
				G3_S	0.28
				G3_S	0.84
				G3_S	0.48
				G3_S	0.28
				G3_S	0.24
				G3_S	0.68
				G3_S	0.2
				G3_S	0.32
				G3_S	1
				G3_S	1.4
				G3_S	3.68
				G3_S	0.32
				G3_S	0.24
				G3_S	0.28
				G3_S	0.32
				G3_S	0.24
				G3_S	1
				G3_S	3.32
				G3_S	0.52
				G3_S	0.48
				G3_S	0.28
				G3_S	0.12
				G3_S	0.24
				G3_S	0.28
				G3_S	0.2
				G3_S	0.48
				G3_S	0.68
				G3_S	1.36
				G3_S	1.08
				G3_S	0.72
				I_W	0.285714
				I_W	0.428571
				I_W	0.171429
				I_W	0.142857
				I_W	0.285714
				I_W	0.142857
				I_W	0.314286
				I_W	0.142857
				I_W	0.0857143
				I_W	0.114286
				I_W	0.142857
				I_W	0.114286
				I_W	0.285714
				I_W	0.0857143
				I_W	0.0857143
				I_W	0.371429
				I_W	0.342857
				I_W	0.285714
				I_W	0.285714
				I_W	0.428571
				I_W	0.142857
				I_W	0.0857143
				I_W	0.0857143
				I_W	0.0857143
				I_W	0.0571429
				I_W	0.0857143
				I_W	0.142857
				I_W	0.285714
				I_W	0.142857
				I_W	0.285714
				I_W	0.142857
				I_W	0.314286
				I_W	0.142857
				I_W	0.142857
				I_W	0.0857143
				I_W	0.0571429
				I_W	0.714286
				I_W	1.42857
				I_W	0.285714
				I_W	0.142857
				I_W	0.285714
				I_W	0.285714
				I_W	0.371429
				I_W	0.114286
				I_W	0.0857143
				I_W	0.142857
				I_W	1.42857
				I_W	0.2
				I_W	0.2
				I_W	0.142857
				I_W	0.0571429
				I_W	0.0857143
				I_W	0.0857143
				I_W	0.0857143
				I_W	0.142857
				I_W	1.42857
				I_W	0.857143
				I_W	0.285714
				I_W	0.285714
				I_W	1.14286
				I_W	0.571429
				I_W	0.285714
				I_W	0.142857
				I_W	0.857143
				I_W	0.285714
				I_W	0.428571
				I_W	2
				I_W	0.571429
				I_W	0.571429
				I_W	1.42857
				I_W	0.857143
				U1_W	0.2
				U1_W	0.857143
				U1_W	1.14286
				U1_W	0.771429
				U1_W	0.485714
				U1_W	0.285714
				U1_W	0.2
				U1_W	0.371429
				U1_W	0.4
				U1_W	0.2
				U1_W	1.71429
				U1_W	0.257143
				U1_W	0.2
				U1_W	0.171429
				U1_W	0.371429
				U1_W	1.14286
				U1_W	0.857143
				U1_W	0.2
				U1_W	0.171429
				U1_W	0.314286
				U1_W	0.771429
				U1_W	0.857143
				U1_W	0.485714
				U1_W	0.428571
				U1_W	0.4
				U1_W	0.342857
				U1_W	0.485714
				U1_W	0.571429
				U1_W	1
				U1_W	0.857143
				U1_W	0.314286
				U1_W	0.2
				U1_W	0.257143
				U1_W	0.314286
				U1_W	0.885714
				U1_W	1.28571
				U1_W	1.71429
				U1_W	0.2
				U1_W	0.171429
				U1_W	0.342857
				U1_W	0.142857
				U1_W	0.314286
				U1_W	1.71429
				U1_W	0.857143
				U1_W	0.714286
				U1_W	0.257143
				U1_W	0.2
				U2_W	0.2
				U2_W	0.142857
				U2_W	0.714286
				U2_W	0.342857
				U2_W	0.171429
				U2_W	0.342857
				U2_W	1.28571
				U2_W	0.771429
				U2_W	0.714286
				U2_W	0.314286
				U2_W	0.2
				U2_W	0.314286
				U2_W	0.6
				U2_W	0.2
				U2_W	0.714286
				U2_W	0.857143
				U2_W	0.771429
				U2_W	0.142857
				U2_W	0.314286
				U2_W	0.2
				U2_W	0.428571
				U2_W	0.6
				U2_W	1
				U2_W	0.428571
				U2_W	0.2
				U2_W	0.2
				U2_W	0.142857
				U2_W	0.228571
				U2_W	0.314286
				U2_W	0.142857
				G1_W	0.142857
				G1_W	0.114286
				G1_W	0.142857
				G1_W	0.285714
				G1_W	0.0857143
				G1_W	0.114286
				G1_W	0.0857143
				G1_W	0.0857143
				G1_W	0.114286
				G1_W	0.0571429
				G1_W	0.0571429
				G1_W	0.114286
				G1_W	0.171429
				G1_W	0.2
				G1_W	0.114286
				G1_W	2.85714
				G1_W	1.42857
				G1_W	0.171429
				G1_W	0.114286
				G1_W	0.857143
				G1_W	0.285714
				G1_W	0.285714
				G1_W	0.228571
				G1_W	0.114286
				G1_W	0.285714
				G1_W	0.0571429
				G1_W	0.571429
				G1_W	0.114286
				G1_W	0.571429
				G1_W	0.285714
				G1_W	0.142857
				G1_W	0.114286
				G1_W	0.2
				G1_W	0.285714
				G1_W	0.571429
				G1_W	0.714286
				G1_W	3.14286
				G1_W	0.142857
				G1_W	0.142857
				G1_W	0.571429
				G1_W	0.428571
				G1_W	2.57143
				G1_W	0.571429
				G1_W	1.42857
				G1_W	0.285714
				G1_W	0.571429
				G1_W	0.428571
				G1_W	0.285714
				G1_W	2
				G1_W	0.285714
				G1_W	1.14286
				G1_W	0.657143
				G1_W	0.714286
				G1_W	1.14286
				G1_W	2.57143
				G1_W	1.42857
				G1_W	0.571429
				G1_W	0.714286
				G1_W	0.285714
				G1_W	0.857143
				G2_W	0.171429
				G2_W	1.14286
				G2_W	1.28571
				G2_W	1.42857
				G2_W	1
				G2_W	0.285714
				G2_W	0.142857
				G2_W	0.0571429
				G2_W	0.342857
				G2_W	0.285714
				G2_W	1
				G2_W	0.428571
				G2_W	0.285714
				G2_W	0.285714
				G2_W	0.857143
				G2_W	0.285714
				G2_W	0.285714
				G2_W	0.142857
				G2_W	0.342857
				G2_W	0.571429
				G2_W	0.571429
				G2_W	3.28571
				G2_W	0.142857
				G2_W	0.0857143
				G2_W	0.0285714
				G2_W	0.571429
				G2_W	0.285714
				G2_W	0.142857
				G2_W	0.714286
				G2_W	0.428571
				G2_W	0.571429
				G2_W	0.428571
				G2_W	1.14286
				G2_W	0.571429
				G2_W	0.571429
				G2_W	0.571429
				G2_W	1
				G2_W	1.42857
				G2_W	0.857143
				G2_W	0.142857
				G2_W	0.571429
				G2_W	0.285714
				G2_W	0.857143
				G2_W	0.285714
				G2_W	0.428571
				G2_W	0.285714
				G2_W	0.571429
				G2_W	1.42857
				G2_W	1.71429
				G2_W	0.714286
				G2_W	0.857143
				G2_W	1
				G2_W	0.142857
				G3_W	0.657143
				G3_W	1.22857
				G3_W	0.342857
				G3_W	0.314286
				G3_W	0.285714
				G3_W	0.257143
				G3_W	0.657143
				G3_W	0.342857
				G3_W	0.428571
				G3_W	0.485714
				G3_W	0.428571
				G3_W	0.571429
				G3_W	0.657143
				G3_W	0.342857
				G3_W	0.457143
				G3_W	0.657143
				G3_W	0.4
				G3_W	0.485714
				G3_W	0.457143
				G3_W	0.971429
				G3_W	0.657143
				G3_W	0.314286
				G3_W	0.342857
				G3_W	0.4

## Sheet: SEM 
	winter leaves
	dense			no dense
	*Waxy stick number (N°*μ-2)			§
	16			2
	13			3
	15			0
	20			1
	17			5
	14			3
	15			2
	18			4
	15			0
	17			5
	16	2.0548	16±2	2.5	1.84089	2.5±1.8
	* 0,1-0,5 micron in length			§ 0,05 micron in length
	Summer leaves
	#Glandular hair number (N°*50μ-2)
	22
	20
	19
	23
	21
	24
	22
	18
	20
	17
	20.6	2.22111	20,6±2,2
	# 1 to 5 micron in length
